1 **COVER PAGE**

2 **Title**

3 Building confidence in crises – the roles of Sierra Leonean religious  
4 leaders' during the 2014-2016 Ebola outbreak.

5 **Authors**

6 Padraig Lyons<sup>1</sup>, Maike Winters<sup>1</sup>, Mohamed F. Jalloh<sup>2</sup>, Helena Nordenstedt<sup>1,3,\*,\*\*</sup> AND Helle  
7 Mølsted Alvesson<sup>1\*\*</sup>

8 <sup>1</sup> Karolinska Institutet, Stockholm, Sweden

9 <sup>2</sup> Centers for Disease Control and Prevention, Atlanta, Georgia, USA

10 <sup>3</sup> Danderyd University hospital, Department of internal medicine and infectious diseases,  
11 Stockholm, Sweden

12 \* *Corresponding author*

13 \*\* *Shared Senior Author*

14 Helena Nordenstedt

15 E-mail: [helena.nordenstedt@ki.se](mailto:helena.nordenstedt@ki.se)

16 Tel: +46 709 625170

17 **Keywords**

18 Ebola Virus Disease, burial practices, religious leaders, outbreak, risk communication,  
19 messages, faith-based messages, Ebola messaging, Sierra Leone, West Africa

20 **Word count**

21 Abstract – 252 words

22 Manuscript – 4963 words

23 **Disclaimer**

24 The findings and conclusions in this report are those of the authors and do not necessarily  
25 represent the official position of the Centers for Disease Control, Danderyd University Hospital  
26 or Karolinska Institutet.

27

## 28 **Abstract**

### 29 **Background**

30 Religious leaders have been involved in risk communication campaigns for many years across  
31 West Africa such as their involvement in the HIV/AIDS pandemic response. Little is known  
32 about religious leaders' perceptions of their role in communicating Ebola risks during the 2014-  
33 2016 outbreak in Sierra Leone and the strategies they adopted to communicate these risks.

### 34 **Methods**

35 In this qualitative study 10 semi-structured interviews were conducted with religious leaders in  
36 Freetown, Sierra Leone, to better understand their perceptions of their roles communicating risk  
37 during the outbreak. Five Christian and five Islamic leaders were recruited from multiple national  
38 religious organisations including male and female leaders. The data was analysed using  
39 thematic analysis.

### 40 **Results**

41 Three themes were developed from the data which illustrate the different strategies religious  
42 leaders used when establishing public confidence in their role communicating risk and the  
43 messages they communicated during the outbreak. The religious leaders describe how they  
44 established themselves as non-political actors in the outbreak response, they provided support  
45 to their communities and used collaboration as a means to effectively communicate risk. The  
46 religious leaders adapted pre-existing roles and established new ones in order to build  
47 confidence among their communities. They flexibly and pragmatically utilised scriptural texts  
48 within these strategies to communicate risk and to establish confidence in their messages.

### 49 **Conclusions**

50 Religious leaders were pragmatic in their approach to risk communication, leveraging political  
51 distrust and collaborating with other actors to strengthen their position. Interreligious unity as  
52 well as scripturally supported messaging helped establish confidence in the public health  
53 emergency response.

## 54 Author Summary

55 Religious leaders are both positively and negatively associated with the promotion of protective  
56 behaviours during outbreaks. During the 2014-2016 Ebola outbreak, thousands of religious  
57 leaders were engaged to communicate Ebola risks and protective Ebola messages across  
58 Sierra Leone. Working with public health professionals they developed Ebola specific messages  
59 by selecting specific passages from scripture to support medical messages. These messages  
60 were positively associated with safe burial behaviours during the outbreak in Sierra Leone.

61  
62 In this study, semi structured interviews were conducted with religious leaders involved in risk  
63 communication campaigns during the outbreak. Our results highlight that religious leaders were  
64 pragmatic in their approach to risk communication, leveraging political distrust and collaborating  
65 with other actors to strengthen their position. Interreligious unity as well as scripturally supported  
66 messaging helped establish confidence in the public health emergency response. In their role  
67 communicating risk religious leaders prioritised building confidence by advocating for  
68 community supported Ebola-measures and by establishing themselves as non-political actors in  
69 the outbreak response.

70 Public health messages developed by religious leaders in line with scriptural texts can be used  
71 as part of risk communication campaigns to improve their public acceptability.

72

## 73 Introduction

74 Across the world, religious leaders are trusted figures in their communities and as such, can be  
75 positive agents of health behaviour change with involvement in public health interventions (1-4).  
76 For instance, hearing messages from religious leaders (pastors or other ministerial staff) that  
77 were supportive of same-sex relationships was associated with an increased willingness to use  
78 HIV prevention strategies (e.g. pre-exposure prophylaxis) among Black Americans in the United  
79 States (5). In Ghana, an intervention in which national and local religious leaders spread HIV  
80 public health messages on mass media was associated with reduced HIV-related stigma (6).

81  
82 Religious leaders have also been associated with hindering public health efforts (7). In the early  
83 2000s in Northern Nigeria, religious leaders propagated misinformation that the oral polio  
84 vaccine contained the HIV-virus and antifertility agents. This misinformation contributed to the  
85 suspension of the polio vaccine campaigns in the region (8). During the HIV/AIDS epidemic,  
86 some religious groups in Nigeria and Burkina Faso opted to promote abstinence over condom  
87 use (9, 10), while others actively encouraged condom use to reduce the spread of infection (11).  
88 The mixed messages also reflect the influence religious leaders had; they have been both  
89 positively and negatively linked to the HIV/AIDS epidemic (6, 9, 10, 12, 13). Religious leaders  
90 also have the power to influence vaccine uptake. During a measles outbreak in a Somali  
91 community in Minnesota, the engagement of religious leaders helped to increase vaccination  
92 rates (14).

93  
94 The Ebola epidemic that affected West Africa between 2014-2016 posed a unique religious  
95 challenge: religious and cultural practices (such as washing a dead body before burial) were

96 strongly associated with Ebola transmission (15, 16). Religious leaders had traditionally  
97 promoted various forms of physical contact with corpses including washing of the deceased as  
98 part of long-standing funeral and burial rituals (Hewlett 2003).

99

100 In order to influence health-behaviours during epidemics and pandemics, risk communication  
101 campaigns must appreciate the complex interactions that exist between individuals, their peer-  
102 groups and wider communities within a society as described by the socio-ecological model (17,  
103 18). Therefore, a key intervention to improve the uptake of safe burials was to engage religious  
104 leaders to promote safe Ebola burials. In collaboration with public health professionals, religious  
105 leaders developed scripturally-based messages that were delivered nationwide in places of  
106 worship and local community events as well as through radio and television programmes (19,  
107 20). Public health messages promoted by religious leaders were positively associated with  
108 willingness to engage in safe burial behaviours during the Ebola outbreak in Sierra Leone (21).

109

110 In times of crisis, people will turn to those they trust as a source of information (22). Religious  
111 leaders are trusted figures in Sierra Leonean society (23). They were recognized as influential  
112 spokespersons for protective health behaviours as part of risk communication campaigns during  
113 the Ebola outbreak (24). The COVID-19 pandemic further demonstrated the important role of  
114 trusted actors in the public health response, including religious leaders (25). The rampant  
115 misinformation surrounding the COVID-19 vaccines made the uptake of protective behaviours  
116 challenging in some areas (26, 27). In Romania for example, the strong standing of religion  
117 combined with negative attitudes towards vaccines held by some influential religious leaders is  
118 thought to have contributed to low vaccination coverage (3). In Israel, on the other hand (a  
119 population with very high vaccination coverage) religious leaders were key in community

120 engagement around COVID-19 vaccination (28). Religious leaders were also involved in the  
121 COVID-19 response in Sierra Leone including promoting the uptake of vaccinations (29).

122

123 Our aim with this study was to understand and contextualise the strategies religious leaders  
124 adopted to build confidence and communicate risk during the Ebola outbreak in Sierra Leone.

## 125 **Methods**

### 126 **Setting**

127 Religion plays an important role in the lives of Sierra Leoneans. The majority of Sierra Leoneans  
128 affiliate with either Islam (77%) or Christianity (22%) (30). Countrywide, religious leaders are  
129 involved in various public health campaigns through faith-based organisations such as the  
130 Islamic Action Group (ISLAG) and the Christian Action Group (CHRISTAG). Both these  
131 organisations were formed in 1987 with support from the Ministry of Health and UNICEF to  
132 undertake social mobilisation activities to promote childhood immunisation. The Action Groups  
133 have since been involved in education, water and sanitation, family planning and HIV/AIDS  
134 prevention. During the civil war in Sierra Leone (1991-2002) ISLAG and CHRISTAG were  
135 brought together to form the Inter-Religious Council of Sierra Leone (IRCSL), an umbrella body  
136 responsible for coordination and advocacy on matters involving religious leaders (1). The IRCSL  
137 helped coordinate and support dialogue between both parties involved in the conflict and helped  
138 facilitate peace negotiations (31, 32). Inter-religious collaboration in Sierra Leone has been  
139 described as “a framework of everyday life in Sierra Leone”, capturing the fundamental nature of  
140 the collaboration across the country (31, 33). The IRCSL remains actively involved in a wide

141 range of religious, health and development projects, collaborating with government, other faith-  
142 based organisations and civil society.

143 The Religious Leaders' Taskforce on Ebola was established in July 2014, two months after the  
144 first Ebola case was confirmed in Sierra Leone, to enhance the role of faith-based organisations  
145 in the response (20). Religious leaders were identified as key figures in community engagement  
146 and risk communication efforts. In collaboration with public health professionals, religious  
147 leaders developed faith-based messages that were delivered nationwide in places of worship  
148 and local community events as well as through radio and television programmes (19, 20).  
149 Religious leaders built trust by engaging the public in dialogue around accurate measures of  
150 Ebola prevention. They worked to address people's concerns and worked to dispel Ebola  
151 misinformation in collaboration with public health professionals (20). Messages covered key  
152 aspects of Ebola risk communication, drawing upon scriptural texts to promote safe Ebola  
153 practices including avoidance of deceased family members and promoting the update of Ebola  
154 burial teams (21).

155 This study was carried out in Freetown, the capital of Sierra Leone where around 1 million of the  
156 country's 8 million people live. The country ranks among the poorest countries on Earth, with  
157 one of the highest maternal mortality rates and had a population with a life expectancy of 60  
158 years in 2021 (34). Freetown was one of the worst affected areas during the outbreak with high  
159 numbers of positive cases and deaths (35). Participants in this study lived and worked in  
160 Freetown at the time of interview. This study was conducted in collaboration with FOCUS1000  
161 (a local NGO) who were one of the organisations involved in the coordination of community  
162 engagement and risk communication programmes during the outbreak.

163 Study design & participant identification



164 This study is based on semi-structured interviews with religious leaders that were involved in  
165 risk communication campaigns across Sierra Leone during the Ebola outbreak 2014-2016. Ten  
166 interviews were conducted with religious leaders in Freetown between March 5<sup>th</sup> to March 20<sup>th</sup>,  
167 2019. All ten of those invited to interview, attended. Religious leaders were recruited using a  
168 combination of purposive and convenience sampling, using the predefined criteria that all  
169 participants must have been involved in risk communication activities during the outbreak.  
170 FOCUS1000 assisted in recruiting the initial Christian and Islamic interviewees through their  
171 local contact networks. Recruitment was conducted with the help of a local Imam who was also  
172 interviewed in the study. The sample was predominantly male (n=7) with five Christian and five  
173 Islamic leaders included. Five of the leaders were pastors and four were Imams, and the final  
174 interviewee was one of the leaders of the National Islamic Council. All the religious leaders held  
175 multiple positions across religious organisations in the country, including leadership positions  
176 with ISLAG, CHRISTAG and IRC SL. Basic characteristics of the participants in the study are  
177 described in Table 1 with their specific roles within faith-based organisations omitted to protect  
178 the identity of participants.

179 Initial analysis was driven by the WHO guidelines for Risk Communication in Emergencies  
180 which provided a framework for analysing risk communication in emergency settings (WHO  
181 2018). The interview guide was largely informed by this framework and a literature search on  
182 risk communication strategies during emergencies. Questions were designed in a chronological  
183 fashion asking questions related to experiences before, during and after the outbreak. The  
184 interview started with open ended questions regarding the participant's religious background  
185 and previous risk communication experience, continuing to questions regarding Ebola  
186 knowledge and then more targeted questions regarding experiences conducting risk  
187 communication campaigns during Ebola including barriers and facilitators to this process.  
188 Finally, open-ended questions were posed regarding reflections on the experience and thoughts

189 going forward. Two pilot interviews were conducted leading to a few minor adjustments to  
190 question-wording and ordering before finalising the guide for the remaining interviews.

191 **Table 1** - Participant information

| <b>Interview ID</b> | <b>Gender</b> | <b>Interview length<br/>(Mins)</b> | <b>Religious<br/>background</b> | <b>Interview location</b> |
|---------------------|---------------|------------------------------------|---------------------------------|---------------------------|
| Interview 1         | Male          | 57                                 | Islam                           | FOCUS1000                 |
| Interview 2         | Male          | 69                                 | Islam                           | FOCUS1000                 |
| Interview 3         | Male          | 43                                 | Islam                           | Mosque                    |
| Interview 4         | Male          | 83                                 | Christian                       | FOCUS1000                 |
| Interview 5         | Female        | 25                                 | Islam                           | FOCUS1000                 |
| Interview 6         | Male          | 70                                 | Christian                       | FOCUS1000                 |
| Interview 7         | Male          | 48                                 | Christian                       | FOCUS1000                 |
| Interview 8         | Female        | 74                                 | Christian                       | Pastor's home             |

|              |        |    |           |           |
|--------------|--------|----|-----------|-----------|
| Interview 9  | Male   | 57 | Christian | FOCUS1000 |
| Interview 10 | Female | 33 | Islam     | FOCUS1000 |

## 192 Data collection and analysis

193 All the interviews were conducted in person, in English. The native language of the interviewees  
194 was Krio, but all interviewees were fluent and comfortable giving the interview in English. Eight  
195 of the ten interviews were conducted in the headquarters of FOCUS1000 (a local NGO) one  
196 took place in a local religious school and one in a pastors' home. PL was in Freetown for one  
197 month in 2019 to carry out the interviews with religious leaders as part of a master's thesis in  
198 Global Health. Noone else was present during the interviews which took place at a time chosen  
199 by the participants and were conducted both during and after office hours. Interviews lasted  
200 between 26 and 83 minutes (Table 1). PL established a relationship with the interviewees via  
201 FOCUS1000 and all interviewees were made aware that the research was a part of a masters'  
202 dissertation. Repeat interviews were not conducted and interviews were not returned to  
203 participants for comment due to the length of time that elapsed between analysis and  
204 conducting of interviews. Brief field notes were made after each interview to summarise any  
205 thoughts the lead author relating to questions and responses.

206 Interviews were transcribed verbatim and analysed in Dedoose, version 8.3.4. Thematic  
207 analysis was used to analyse the data, with initial open coding of three of the transcripts using  
208 both in vivo codes and codes derived by the lead author (PL). This coding framework was then  
209 applied across the remaining 7 interviews. When all transcripts had been coded, several  
210 emerging codes were retrospectively applied across the interviews and those first transcripts

211 were revised again to check for consistency in the coding process. The codes were grouped in  
212 categories leading to the formation of sub-themes and the final themes. During the course of the  
213 analysis, authors discussed and provided feedback on the codes and the emerging themes. In  
214 comparing and contrasting the religious leaders' responses to one another, the analysis became  
215 more latent allowing for a deeper understanding of their opinions on their work during the  
216 outbreak.

## 217 Ethical considerations

218 The Sierra Leone Research and Scientific Review Committee granted ethical approval for this  
219 study in March 2019. All interviewees provided informed consent to participate by signing an  
220 informed consent form.

221

222 **Table 2** – Categories, Sub-themes and Themes

|                                                                                                                                                                                       |                                                                                                                 |                                                               |
|---------------------------------------------------------------------------------------------------------------------------------------------------------------------------------------|-----------------------------------------------------------------------------------------------------------------|---------------------------------------------------------------|
| Religious leaders are trusted because they are ingrained in communities and work in communities, unlike politicians                                                                   | Religious leaders are set apart from politicians because they come from within communities and serve the people | <b>Establishing religious leaders as non-political actors</b> |
| People don't listen to political people like they listen to religious people because they understand that when religious people speak it is going to be a message that benefits them. |                                                                                                                 |                                                               |

|                                                                                                                                           |                                                                                                  |                                                                                                           |
|-------------------------------------------------------------------------------------------------------------------------------------------|--------------------------------------------------------------------------------------------------|-----------------------------------------------------------------------------------------------------------|
| <p>Messages from religious leaders are taken more seriously because people have more confidence in religious leaders than politicians</p> |                                                                                                  |                                                                                                           |
| <p>Religious leaders have more public confidence than politicians because they can deal with ideologies</p>                               | <p>Religious leaders are not incentivised by money or other benefits the way politicians are</p> |                                                                                                           |
| <p>People don't trust politicians or medical people so religious leaders are seen as neutral people</p>                                   |                                                                                                  |                                                                                                           |
| <p>People don't have confidence in politicians because they are paid for what they do, unlike religious leaders</p>                       |                                                                                                  |                                                                                                           |
|                                                                                                                                           |                                                                                                  |                                                                                                           |
| <p>Advocating to the government to add a dignified aspect to Ebola burials</p>                                                            | <p>Advocating to authorities regarding burial practices</p>                                      | <p><b>Establishing confidence and providing community support in the context of an Ebola outbreak</b></p> |
| <p>Raising public requests to allow family members to attend Ebola victims' funerals to authorities</p>                                   |                                                                                                  |                                                                                                           |
| <p>Raising public requests to have more women on burial teams to authorities</p>                                                          |                                                                                                  |                                                                                                           |

|                                                                                                                         |                                                                                                                    |                                                                   |
|-------------------------------------------------------------------------------------------------------------------------|--------------------------------------------------------------------------------------------------------------------|-------------------------------------------------------------------|
| Providing emotional and spiritual support to people in quarantine                                                       | Religious leaders provided support for those in quarantine                                                         |                                                                   |
| Giving medical advice to people in quarantine                                                                           |                                                                                                                    |                                                                   |
| Addressing public fears and concerns regarding burial teams                                                             | Religious leaders providing community support for other Ebola related issues                                       |                                                                   |
| Support figure for people in communities whose family died from Ebola                                                   |                                                                                                                    |                                                                   |
| Providing support to those who are sick in hospitals and at home                                                        |                                                                                                                    |                                                                   |
|                                                                                                                         |                                                                                                                    |                                                                   |
| Interreligious collaboration provides a believability and establishes public confidence in religious leaders messages   | Interreligious collaboration helped to build confidence in the religious leaders as messengers during the outbreak | <b>Collaboration built public confidence in religious leaders</b> |
| Religious leaders speaking with one voice - prevents conflicting messages and increases trustworthiness of the messages |                                                                                                                    |                                                                   |

|                                                                                                                                                                                                      |                                                                                                             |  |
|------------------------------------------------------------------------------------------------------------------------------------------------------------------------------------------------------|-------------------------------------------------------------------------------------------------------------|--|
| Some religious leaders' messages caused confusion early in the outbreak                                                                                                                              |                                                                                                             |  |
| Collaboration with technical people regarding specific issues (medical people accompanying to answer medical questions) helps build public confidence in the religious leaders as risk communicators | Collaboration with technical people and local leaders built public confidence in religious leaders messages |  |
| Collaboration with local leaders and traditional healers to build support in Ebola messages                                                                                                          |                                                                                                             |  |

223

224 **Results**

225 Three primary themes were identified from the data representing the strategies religious leaders  
 226 used to enhance public confidence in their role as risk communicators and the messages they  
 227 communicated: providing community support, collaboration, and establishing themselves as  
 228 non-political figures. The religious leaders discuss these three themes as strategies they flexibly  
 229 used to build confidence in their role communicating risk during the outbreak.

230 The religious leaders adapted pre-existing roles and established new ones in order to build this  
 231 confidence during the outbreak. Scripture is ingrained in most aspects of religious leaders'  
 232 communication with the public and they flexibly made use of religious texts when establishing  
 233 confidence in their Ebola messages across these themes. Themes are categorised and  
 234 summarised in table 2. They are further discussed and illustrated with quotes below.

## 235 **Establishing religious leaders as non-political actors**

236 Early in the Ebola outbreak political conspiracies and distrust in political figures were  
237 commonplace in Sierra Leone. Rumours circulated among local populations that the  
238 government was intentionally spreading the virus along with a general perception of corruption  
239 and that the virus was a government ruse to generate international aid (Anderson 2015,  
240 Wilkinson 2015). Against this backdrop religious leaders said that they established public  
241 confidence as Ebola risk communicators by separating themselves from politicians and political  
242 organisations.

243 *“...[the public] don't know whether to believe the health workers or whether to believe the*  
244 *politicians, so they were confused. So this made us [Religious leaders] to be relevant in the*  
245 *message dissemination because they are seeing us as neutral people.”* (Interview 1 - Muslim)

246 *“...you will discover that the religious leader will get more results than that politician*  
247 *because they [politicians] are coming from the angle of distrust.”* (Interview 4 - Christian)

248 The religious leaders describe how their separation from political affiliations provided them with  
249 a unique platform to approach their risk communication efforts.

250 *“Some of them [the public] were saying it is good because they lack trust in the politician,*  
251 *but since you people [religious leaders] are here, we believe you. We will go by what you say.”*  
252 (Interview 4 - Christian)

253 People within communities recognised the religious leaders when they communicated Ebola  
254 messages because, unlike the politicians, they were frequently seen and embedded within  
255 communities.



256 *“...so that's the big tool that we have that the politicians don't have, even those in power.*  
257 *Because maybe he [Politician] is in this house [house belonging to a member of the public]. The*  
258 *people that are there, he doesn't know them. A religious person doesn't do that. I go there first*  
259 *thing in the morning saying “Good morning how is the old man, the old lady, are they okay?”*  
260 *Maybe there is a problem that I need to sort out, to come to their aid.” (Interview 2 - Muslim)*

261 One religious leader speculated that the reason political figures are not trusted like the religious  
262 leaders is because of the financial gain involved in their roles. The religious leaders define their  
263 work as vocational and their lack of apparent wealth as a reason to garner public confidence.

264 *“When the minister [political leader] talks, he is lying. But when I appear on TV...they*  
265 *[the public] know when I say something it is going to work, it is going to benefit them. Because*  
266 *they [the public] don't pay me for this work...I don't have a new bicycle, but I'm dedicated to*  
267 *doing this job” (Interview 2 - Muslim)*

## 268 **Establishing confidence and providing community support in the** 269 **context of an Ebola outbreak**

270 Religious leaders have long provided emotional and spiritual support for many Sierra Leoneans,  
271 and they adapted this role to suit the unique needs of their communities during the Ebola  
272 outbreak (Featherstone 2015, Hewlett). As a result of the direct and indirect effects of Ebola  
273 many Sierra Leoneans found themselves in challenging situations. The religious leaders  
274 described themselves as figures of hope for their communities in many of these circumstances,  
275 providing a listening ear and spiritual meaning to the situations the public faced.

276 *“...we give them the words of hope, in the messages, give them courage that they will*  
277 *not die, they will come out. Let them just listen to what the doctor say. Follow the instructions....*  
278 *Sometimes they call me 2, 3 am in the morning; “reverend I am giving up, the pain I am feeling*

279 *so much pain, even to hold the cup for me to drink I cannot, the pain". I said "This is not for you.*  
280 *You will surely come over this".*" (Interview 8 - Christian)

281 This *hope* the religious leaders describe is contextualised in terms of the individual's spirituality  
282 and the essence of placing faith in a higher power beyond the outbreak. The religious leaders  
283 describe how they would stand outside the homes of those who were quarantined and talk to  
284 them, providing a sense of hope that they will recover from Ebola.

285 The suffering community members were facing during the outbreak was contextualised by the  
286 religious leaders who compared Ebola to the infectious diseases discussed in the Bible  
287 (leprosy) and the Qur'an (the *Tha'oon Amwas*). This facilitated public understanding of the Ebola  
288 measures religious leaders were communicating while also providing a means to spiritually  
289 interpret the outbreak.

290 *"There's nothing in Islam called Ebola. But there are similar things, like the tha'oon*  
291 *[infectious disease discussed in the Qur'an]"* (Interview 2 - Muslim)

292 *"In the bible lepers were set apart...because they thought it was a contagious disease"*  
293 (Interview 9 - Christian)

294 The religious leaders further report building confidence in their messages by advocating for the  
295 needs of their communities. Many Sierra Leoneans were frustrated by the specific restrictions  
296 placed upon them during the outbreak, for instance, restrictions on traditional burial practices  
297 which were imposed by the government to reduce the spread of Ebola (Jalloh 2020). These  
298 restrictions did not consider the spiritual and cultural needs of the public. Religious leaders  
299 worked with (medical) authorities to design safe and dignified burials, including incorporating  
300 more women into burial teams in response to concerns that deceased women were being  
301 buried by men.

302           *“The burial team was full of male. So at that time, the women, they rose up and they said*  
303 *uh no! We need women in the burial teams. We went to the government and we said this is the*  
304 *concern of our people ....The government agreed.”* (Interview 4 - Christian)

305 The religious leaders described this advocacy as a tool to provide their communities with what  
306 they needed at a time of crisis and in doing so built trust in their role as communicators.

307           *“[the public] want to appeal to you, to appeal to the government in the area of*  
308 *burial...even though they are talking about safe burial, we want to add dignity into it. It is our*  
309 *culture, we need to give our funeral rights to our loved ones when they die.”* (Interview 8 -  
310 Christian)

### 311 **Collaboration built public confidence in religious leaders**

312 During the Ebola outbreak Christian and Islamic leaders worked together to develop and  
313 communicate Ebola messages across Sierra Leone in a coordinated manner. The religious  
314 leaders described how this interreligious collaboration was beneficial for the risk communication  
315 campaigns as it emphasised, for the public, the importance of putting aside religious differences  
316 to focus on the outbreak.

317           *“At first, they [the public] were thinking that because of our different beliefs it would be*  
318 *difficult for us [Muslims & Christians] to come together, you know, but we were able to make the*  
319 *people know that, no, in fact, it is the source of our strength to come together... Some of us*  
320 *were able to say look, when Ebola is coming it is not looking for a Christian, it's not looking for a*  
321 *Muslim, it's not looking for your tribe, it's not looking for your colour, it is just looking for an*  
322 *individual that it can suppress, kill, destroy.”* (Interview 4 - Christian)

323 There was a positive public reaction to seeing Islamic and Christian leaders entering towns and  
324 villages together according to the religious leaders. They describe the positive effect of seeing  
325 religious leaders standing side-by-side in Mosques and Churches communicating in unison.

326 *“We do everything in common. Sometimes we even go into churches, when it is required*  
327 *to go to the church, we go to the church when it is required to come to the mosque, we do that*  
328 *also. Sometimes you can see some Christians in the mosque, sometimes you can see some*  
329 *Muslim in the church. Just for the people to get the message.”* (Interview 1 - Christian)

330 This interreligious collaboration was described from a more pragmatic perspective by a number  
331 of the religious leaders. They acknowledged the confusion that different, often conflicting  
332 messages from multiple sources caused during the outbreak. They considered religious leaders  
333 of different doctrines speaking with one unified voice as much clearer and more inherently  
334 understandable to their audiences.

335 *“...you know initially, at first, the misinformation was so much...the information was*  
336 *coming in every direction....everyone was confused.”* (Interview 6 - Christian)

337 *“...we said that we are going to speak with one voice. We don’t want to speak with*  
338 *conflicting messages. So that at least when you go to the south, I go to the north and he goes to*  
339 *the east, we make sure that the message that you are giving the people is the same message.*  
340 *Don’t say any different thing. So, we all speak with one voice. Yes, no conflicting message.”*  
341 (Interview 7 - Christian)

342 There was acknowledgement from the religious leaders that they contributed to the public’s  
343 confusion early in the outbreak. The subsequent unified approach to risk communication was  
344 described as important to prevent false information being spread by religious leaders.

345           “...messages came that people should wash with water and salt, then the Ebola will not  
346 affect you, oh yeah...a prophet from Nigeria, you know, they gave a portion [of the bible]... it  
347 went like a wildfire. Even Muslims were washing, they were bathing with that stuff” (Interview 4 -  
348 Christian)

349 Collaboration was also described by the religious leaders in terms of their interactions with other  
350 sectors of the Ebola response and the beneficial impact this had on their work overall. When  
351 communicating their messages, the religious leaders often entered communities as part of a  
352 larger team which included medical experts and other non-religious people. The religious  
353 leaders' presence beside these medical teams made their messaging more acceptable to the  
354 public.

355           “When it comes to the technical parts of the disease, we call on the technical people.  
356 Because when we are going [into communities] sometimes we go with some health officers, we  
357 involve the DHMT [District Health Medical Team]... We will call them to come on board and they  
358 explain to the people. But because we are around, they [public] will accept them [medical team  
359 messages].” (Interview 4 - Christian)

360 The religious leaders would also engage village chiefs, community leaders and traditional  
361 healers upon entering towns and villages as a means to support their communication  
362 campaigns. These local leaders would help to disseminate messages through the communities  
363 using megaphones and going house to house to spread the messages. The religious leaders  
364 also described their approach to collaboration in pragmatic terms. Although they may not have  
365 agreed with external parties such as the traditional healers, they were willing to put this aside for  
366 the greater good. They described these actions in terms of how best to communicate their  
367 messages.

368           *“We also saw it necessary to work with the traditional healers because the practice of*  
369 *the traditional healers very contradicts the belief of the Christian and the Muslim. But because it*  
370 *was a national emergency the thing [Ebola] was killing our people, we had to say no, let’s ignore*  
371 *some of this...fundamental right...and then address the issue that is killing people.”* (Interview 4  
372 - Christian)

## 373 Discussion

374 Three primary strategies were described in the data which religious leaders used to build  
375 confidence in their role communicating risk and the messages they communicated; establishing  
376 themselves as non-political actors in the outbreak, providing community support and using  
377 collaboration to build confidence in their communicated messages. They established new  
378 strategies as well as building upon pre-existing religious roles in Sierra Leonean society to  
379 achieve this. Religious leaders pragmatically utilised scripture to communicate risk and also to  
380 establish confidence in their messages.

381 Trust in institutions and governments is considered a key component of an effective outbreak  
382 response (36). Our findings suggest that religious leaders built confidence in their messages by  
383 distancing themselves from politicians, who were not widely trusted (37, 38). With effect it  
384 seems, as public health messages promoted by religious leaders have also been positively  
385 associated with willingness to engage in safe burial behaviours during the Ebola outbreak in  
386 Sierra Leone (21). Instead of associating with political leaders, the religious leaders sought  
387 different trust alliances – for instance through inter-religious collaborations.

388 While Sierra Leone is unique with its high levels of interreligious tolerance, the power of  
389 communicating with a unified message holds lessons for other emergency settings. Even  
390 though the leaders in this study did not discuss the ideological conflicts which can exist between

391 the two religions (39), our findings highlight the importance of finding a middle ground to help  
392 bolster a collaborating position. This is also shown through the religious leaders' collaboration  
393 with traditional healers, for which doctrinal differences were put aside to fight their common  
394 enemy. The religious leaders seem to appreciate the positive impact that seeing others  
395 cooperate can have on an individual's willingness to cooperate (36, 40).

396 A number of the religious leaders in our study referred to themselves as *non-political* and  
397 *neutral* when describing their role in Sierra Leonean society. While they pragmatically separated  
398 themselves from political affiliations to assist in their risk communication strategies, evidence  
399 suggests that religion and politics are closely intertwined and difficult to separate from one  
400 another in Sierra Leone (23, 33). The religious leaders in our study do not reflect upon this when  
401 referring to their role as *non-political* and *neutral*. Similarly, they do not reflect upon some of  
402 their religious doctrines which are in conflict with basic public health messages such as  
403 contraception and birth control which have been linked both positively and negatively to  
404 religious involvement (9-11, 13). While religious leaders were associated with uptake of positive  
405 health behaviours during the Ebola outbreak in Sierra Leone the influence these roles garner  
406 may well carry over to other less favourable impacts on public health and political influence  
407 which needs to be considered when looking towards ongoing and future outbreaks.

408 Religious leaders were embedded in communities and could appreciate the specific needs of  
409 the individual community members while also distributing messaging through wider  
410 communication campaigns. The socio-ecological framework highlights the importance of  
411 intrapersonal and interpersonal relationships when trying to affect behaviour change (17, 41).  
412 The top-down approach to communication seen early in the outbreak was not as effective in  
413 part because it did not account for the socio-cultural realities of many Sierra Leoneans. For  
414 example, burial teams were not always dignified making accepting them challenging for many,  
415 and avoidance of caregiving for sick family members was not always an option (1, 42).

416 The influence of socio-ecological factors on the uptake of protective health-behaviours was  
417 similarly demonstrated during the COVID-19 pandemic. Adherence to mask wearing guidance  
418 and compliance with self-isolation were positively associated with household income, age,  
419 personal attitudes, educational attainment and gender (43, 44). The COVID-19 pandemic has  
420 demonstrated the important role of trusted actors in the public health response, including  
421 religious leaders (45). The importance of building public confidence and trust in the messenger  
422 is key to effective risk communication as has been established previously using the socio-  
423 ecological model (36, 46, 47).

424 Religious leaders describe their scriptural texts as an integral part of risk communication  
425 campaigns. From contextualising the outbreak for those who are sick and fearful, to developing  
426 the risk communication messages around scripture, the religious texts were ingrained across  
427 their actions. Producing messages in support of public health messages adapted to suit the  
428 needs of a population can help acceptability and efficacy of public health programmes (48, 49).  
429 A willingness to engage with the medical professionals and build Ebola specific messages from  
430 scripture may be a practical and beneficial application of the findings of this study.

## 431 **Strengths and limitations**

432 The religious leaders in this study are a diverse cohort of participants with male and female,  
433 Christian and Islamic leaders represented. The study sample is limited to the perspective of  
434 religious leaders, most of whom held powerful positions in religious and faith-based  
435 organisations in Sierra Leone. As such, their opinions may not be entirely representative of all  
436 religious leaders in Freetown and indeed those in more rural parts of the country. Nonetheless,  
437 the perspective of these leaders may give a more overarching viewpoint of religious leader  
438 involvement in the outbreak.



439

440 While the sample was limited to 10 religious leaders, the power could be considered robust  
441 since the aim of the study was well-focused, the sample of participants was unique and the  
442 participation rate was 100% (50). The study was also informed by theory and the participants  
443 provided in depth and reflective responses.

444

445 A few potential sources of bias should be mentioned. Interviews were carried out by PL who is a  
446 caucasian male, which may have introduced a response bias. Arguably the religious leaders  
447 may have provided more candid responses to a Sierra Leonean interviewer. On the other hand,  
448 they may have provided the most honest answers to someone they perceive as outside the  
449 local healthcare system particularly when criticising the outbreak response efforts. Harvey's  
450 "elite interviews" also helped to inform PL on how to approach the interviews in terms of building  
451 trust and engaging these religious leaders who are considered high standing community figures  
452 (51). Participants were all interviewed in Freetown. The experience of the outbreak may have  
453 been significantly different for those living in remote and rural areas and may differ between  
454 regions, therefore findings are limited to Freetown. Eight out of 10 of the interviews were  
455 conducted in FOCUS1000 headquarters, potentially leading to a response bias. This effect was  
456 somewhat mitigated by reiterating that PL was not affiliated with FOCUS1000 and all  
457 interviewees' responses would remain entirely confidential. Finally, an unavoidable source of  
458 bias in this study was that the qualitative interviews were conducted more than three years after  
459 the outbreak, which might have led to omission of details and possible recency bias in terms of  
460 some of the later successes seen in the outbreak.

## 461 Conclusion

462 Religious leaders saw themselves as key actors in risk communication campaigns during the  
463 Ebola outbreak in Sierra Leone. They responded to the needs of their communities and the  
464 rapidly changing context of the outbreak to communicate risk. In this study religious leaders  
465 highlighted the key role that inter-religious collaboration and collaboration with medical experts  
466 had in their role communicating risk and applied their scriptural texts to suit the needs of the  
467 outbreak response. They were pragmatic in their approach to risk communication and engaged  
468 with multiple different facets of the outbreak response to strengthen their position. Religious  
469 leaders are embedded across Sierra Leonean society within small communities through to  
470 nationwide organisations. It is these broad ranging networks that allow religious leaders to  
471 effectively approach risk communication strategies at multiple levels while accounting for the  
472 socio-ecological realities of the individual.

473

## 474 **Declarations**

## 475 **Ethics approval and consent to participate**

476 The Sierra Leone Research and Scientific Review Committee granted ethical approval for this  
477 study in March 2019. All interviewees provided informed consent to participate by signing an  
478 informed consent form.

## 479 **Consent for publication**

480 No consent was required for publication, as no identifiable information is contained within.

## 481 **Availability of data and materials**

482 The datasets used and/or analysed during the current study are available from the  
483 corresponding author on reasonable request.

## 484 Competing interests

485 The authors declare no competing interests.

## 486 Funding

487 This study was funded by the Swedish Research Council (Vetenskapsrådet: 2017–05581). The  
488 funders had no role in the study design, data collection and analysis, decision to publish, or  
489 preparation of the manuscript. The corresponding author had full access to all the data in the  
490 study and had final responsibility for the decision to submit for publication. Open Access funding  
491 provided by Karolinska Institute.

## 492 Authors' contributions

493 PL, MW, MFJ, and HN led the overall study design with substantial contributions made by all co-  
494 authors for one or more of the study components. PL organised and coordinated primary data  
495 collection with assistance from FOCUS100. PL led secondary data analysis with support from  
496 MW, HMA & HN. PL, MW, HMA and HN provided critical input to the data interpretation. PL led  
497 the writing of the manuscript with substantial contributions made by all co-authors. All the  
498 authors reviewed and approved the final version of the manuscript.

## 499 Acknowledgements

500 The authors would like to thank Mr Mohammad B Jalloh, Mr Paul Sengeh and everyone at  
501 FOCUS1000 in Sierra Leone for their collaboration on this research project and their tireless

502 work during the pandemic. The authors would also like to thank the religious leaders for their  
503 participation in the study.

504

## 505 REFERENCES

- 506 1. Blevins JB, Jalloh MF, Robinson DA. Faith and Global Health Practice in Ebola and HIV  
507 Emergencies. *American Journal of Public Health*. 2019;109(3):379-84.
- 508 2. Lincoln Leehang L, Warren D, Han Lily Q, Donald CC. Exploring trust in religious leaders  
509 and institutions as a mechanism for improving retention in child malnutrition interventions in the  
510 Philippines: a retrospective cohort study. *BMJ Open*. 2020;10(9):e036091.
- 511 3. Dascalu S, Flammer PG, Ghafari M, Henson SC, Nascimento R, Bonsall MB. Engaging  
512 Religious Institutions and Faith-Based Communities in Public Health Initiatives: A Case Study of  
513 the Romanian Orthodox Church During the COVID-19 Pandemic. *Frontiers in Public Health*.  
514 2021;9.
- 515 4. Downs JA, Mwakisole AH, Chandika AB, Lugoba S, Kassim R, Laizer E, et al. Educating  
516 religious leaders to promote uptake of male circumcision in Tanzania: a cluster randomised trial.  
517 *The Lancet*. 2017;389(10074):1124-32.
- 518 5. Ransome Y, Bogart LM, Nunn AS, Mayer KH, Sadler KR, Ojikutu BO. Faith leaders'  
519 messaging is essential to enhance HIV prevention among black Americans: results from the  
520 2016 National Survey on HIV in the black community (NSHBC). *BMC Public Health*.  
521 2018;18(1):1392.

- 522 6. Boulay M, Tweedie I, Fiagbey E. The effectiveness of a national communication  
523 campaign using religious leaders to reduce HIV-related stigma in Ghana. *African Journal of*  
524 *AIDS Research*. 2008;7(1):133-41.
- 525 7. Tomkins A, Duff J, Fitzgibbon A, Karam A, Mills EJ, Munnings K, et al. Controversies in  
526 faith and health care. *The Lancet*. 2015;386(10005):1776-85.
- 527 8. Jegede AS. What led to the Nigerian boycott of the polio vaccination campaign? *PLoS*  
528 *Med*. 2007;4(3):e73.
- 529 9. Trinitapoli J. The AIDS-related activities of religious leaders in Malawi. *Global Public*  
530 *Health*. 2011;6(1):41-55.
- 531 10. Barro A, Nana NG, Soubeiga D, Bationo N, Pafadnam Y, Pilabre H, et al. Knowledge,  
532 beliefs and perceptions of religious leaders on modern contraceptive use in Burkina Faso: a  
533 qualitative study. *Pan Afr Med J*. 2021;39:216.
- 534 11. Ucheaga DN, Hartwig KA. Religious leaders' response to AIDS in Nigeria. *Global Public*  
535 *Health*. 2010;5(6):611-25.
- 536 12. McGirk J. Religious leaders key in the Middle East's HIV/AIDS fight. *The Lancet*.  
537 2008;372(9635):279-80.
- 538 13. Adedini SA, Babalola S, Ibeawuchi C, Omotoso O, Akiode A, Odeku M. Role of  
539 Religious Leaders in Promoting Contraceptive Use in Nigeria: Evidence From the Nigerian  
540 Urban Reproductive Health Initiative. *Glob Health Sci Pract*. 2018;6(3):500-14.
- 541 14. Hall V BE, Kenyon C, et al. Measles Outbreak — Minnesota April–May 2017.  
542 2017;66:713–7.

- 543 15. Jalloh MF, Bunnell R, Robinson S, Jalloh MB, Barry AM, Corker J, et al. Assessments of  
544 Ebola knowledge, attitudes and practices in Forecariah, Guinea and Kambia, Sierra Leone,  
545 July-August 2015. *Philos Trans R Soc Lond B Biol Sci.* 2017;372(1721).
- 546 16. Tiffany A, Dalziel BD, Kagume Njenge H, Johnson G, Nugba Ballah R, James D, et al.  
547 Estimating the number of secondary Ebola cases resulting from an unsafe burial and risk factors  
548 for transmission during the West Africa Ebola epidemic. *PLoS Negl Trop Dis.*  
549 2017;11(6):e0005491.
- 550 17. Stokols D. Translating social ecological theory into guidelines for community health  
551 promotion. *Am J Health Promot.* 1996;10(4):282-98.
- 552 18. Sallis JF, Owen N. Ecological models of health behavior. *Health behavior: Theory,*  
553 *research, and practice*, 5th ed. Hoboken, NJ, US: Jossey-Bass/Wiley; 2015. p. 43-64.
- 554 19. Winters M, Jalloh MF, Sengeh P, Jalloh MB, Conteh L, Bunnell R, et al. Risk  
555 Communication and Ebola-Specific Knowledge and Behavior during 2014-2015 Outbreak,  
556 Sierra Leone. *Emerg Infect Dis.* 2018;24(2):336-44.
- 557 20. CAFOD, CRS, World Vision UK. Protecting the living and Honouring the dead: The  
558 barriers and enablers to community acceptance and implementation of safe burials. [Internet].  
559 2017. p. 19.
- 560 21. Lyons P, Winters M, Zeebari Z, Schmidt-Hellerau K, Sengeh P, Jalloh MB, et al.  
561 Engaging religious leaders to promote safe burial practices during the 2014-2016 Ebola virus  
562 disease outbreak, Sierra Leone. *Bull World Health Organ.* 2021;99(4):271-9.

- 563 22. Cairns G, de Andrade M, MacDonald L. Reputation, relationships, risk communication,  
564 and the role of trust in the prevention and control of communicable disease: a review. *J Health*  
565 *Commun.* 2013;18(12):1550-65.
- 566 23. Turay T. Civil society and peacebuilding: the role of the Inter-Religious Council in Sierra  
567 Leone [Internet] Accord 9.2000 [Available from: [https://www.c-r.org/accord-article/civil-society-](https://www.c-r.org/accord-article/civil-society-and-peacebuilding-role-inter-religious-council-sierra-leone)  
568 [and-peacebuilding-role-inter-religious-council-sierra-leone.](https://www.c-r.org/accord-article/civil-society-and-peacebuilding-role-inter-religious-council-sierra-leone)
- 569 24. Marshall K, Smith S. Religion and Ebola: learning from experience. *Lancet.*  
570 2015;386(10005):e24-5.
- 571 25. Organization WH. World Health Organization strategy for engaging religious leaders,  
572 faith-based organizations and faith communities in health emergencies. 2021.
- 573 26. Aw J, Seng JJB, Seah SSY, Low LL. COVID-19 Vaccine Hesitancy-A Scoping Review of  
574 Literature in High-Income Countries. *Vaccines (Basel).* 2021;9(8).
- 575 27. Singh K, Lima G, Cha M, Cha C, Kulshrestha J, Ahn Y-Y, et al. Misinformation,  
576 believability, and vaccine acceptance over 40 countries: Takeaways from the initial phase of the  
577 COVID-19 infodemic. *PLOS ONE.* 2022;17(2):e0263381.
- 578 28. Rosen B, Waitzberg R, Israeli A. Israel's rapid rollout of vaccinations for COVID-19.  
579 *Israel Journal of Health Policy Research.* 2021;10(1):6.
- 580 29. Kulkarni S, Sengeh P, Eboh V, Jalloh MB, Conteh L, Sesay T, et al. Role of Information  
581 Sources in Vaccination Uptake: Insights From a Cross-Sectional Household Survey in Sierra  
582 Leone, 2019. *Glob Health Sci Pract.* 2022;10(1).
- 583 30. Statistics Sierra Leone (SSL), Beresford S, Bah S. Sierra Leone 2015 population and  
584 housing census: Thematic report on population structure and population distribution [Internet]

585 2017 [Available from:

586 [https://www.statistics.sl/images/StatisticsSL/Documents/Census/2015/sl\\_2015\\_phc\\_thematic\\_re](https://www.statistics.sl/images/StatisticsSL/Documents/Census/2015/sl_2015_phc_thematic_report_on_pop_structure_and_pop_distribution.pdf)  
587 [port on pop structure and pop distribution.pdf](https://www.statistics.sl/images/StatisticsSL/Documents/Census/2015/sl_2015_phc_thematic_report_on_pop_structure_and_pop_distribution.pdf).

588 31. Day J. Everyday Practices of Toleration: The Interfaith Foundations of Peace Accords in  
589 Sierra Leone. *Politics and Religion*. 2021;14(1):54-82.

590 32. Anne Hurd H. The Inter-Religious Council of Sierra Leone as Peace Facilitator in Post-  
591 1991 Sierra Leone. *Peace & Change*. 2016;41(4):425-51.

592 33. Conteh PS. The Role of Religion During and After the Civil War in Sierra Leone. *Journal*  
593 *for the Study of Religion*. 2011;24(1):55-76.

594 34. United Nations DoEaSA, Population Division (2022). *World Population Prospects 2022*.  
595 (UN DESA/POP/2022/DC/NO. 9). 2022 [

596 35. Lamunu M, Olu OO, Bangura J, Yoti Z, Samba TT, Kargbo DK, et al. Epidemiology of  
597 Ebola Virus Disease in the Western Area Region of Sierra Leone, 2014-2015. *Front Public*  
598 *Health*. 2017;5:33.

599 36. Bavel JJV, Baicker K, Boggio PS, Capraro V, Cichocka A, Cikara M, et al. Using social  
600 and behavioural science to support COVID-19 pandemic response. *Nature Human Behaviour*.  
601 2020;4(5):460-71.

602 37. Wilkinson A, Parker M, Martineau F, Leach M. Engaging 'communities': anthropological  
603 insights from the West African Ebola epidemic. *Philosophical transactions of the Royal Society*  
604 *of London Series B, Biological sciences*. 2017;372(1721):20160305.



- 605 38. Wilkinson A, Parker M, Martineau F, Leach M. Engaging 'communities': anthropological  
606 insights from the West African Ebola epidemic. *Philos Trans R Soc Lond B Biol Sci*.  
607 2017;372(1721).
- 608 39. Brima A. Preventing religious conflict in Sierra Leone: a careful balancing act 2017 [cited  
609 2023. Available from: [https://www.peaceinsight.org/en/articles/preventing-religious-conflict-](https://www.peaceinsight.org/en/articles/preventing-religious-conflict-sierra-leone-careful-balancing-act/?location=sierra-leone&theme=mediation-dialogue)  
610 [sierra-leone-careful-balancing-act/?location=sierra-leone&theme=mediation-dialogue](https://www.peaceinsight.org/en/articles/preventing-religious-conflict-sierra-leone-careful-balancing-act/?location=sierra-leone&theme=mediation-dialogue).
- 611 40. Fischbacher U, Gächter S, Fehr E. Are people conditionally cooperative? Evidence from  
612 a public goods experiment. *Economics Letters*. 2001;71(3):397-404.
- 613 41. Sastry S, Dutta M. Health Communication in the Time of Ebola: A Culture-Centered  
614 Interrogation. *Journal of Health Communication*. 2017;22:10-4.
- 615 42. Kirsten S-H, Maike W, Pdraig L, Bailah L, Mohammad BJ, Paul S, et al. Homecare for  
616 sick family members while waiting for medical help during the 2014-2015 Ebola outbreak in  
617 Sierra Leone: a mixed methods study. *BMJ Global Health*. 2020;5(7):e002732.
- 618 43. Jang SH. Social-ecological factors related to preventive behaviors during the COVID-19  
619 pandemic in South Korea. *PLOS ONE*. 2022;17(3):e0266264.
- 620 44. Casola AR, Kunes B, Cunningham A, Motley RJ. Mask Use During COVID-19: A Social-  
621 Ecological Analysis. *Health Promot Pract*. 2021;22(2):152-5.
- 622 45. Brynne G, Rawlance N, Adalbert T, Vergil de C, Elizabeth M, Alpha AD, et al.  
623 Community engagement for COVID-19 prevention and control: a rapid evidence synthesis. *BMJ*  
624 *Global Health*. 2020;5(10):e003188.

- 625 46. Petersen MB, Bor A, Jørgensen F, Lindholt MF. Transparent communication about  
626 negative features of COVID-19 vaccines decreases acceptance but increases trust.  
627 Proceedings of the National Academy of Sciences. 2021;118(29):e2024597118.
- 628 47. Christensen T, Yamamoto K, Aoyagi S. Trust in Local Government: Service Satisfaction,  
629 Culture, and Demography. *Administration & Society*. 2020;52(8):1268-96.
- 630 48. Heward-Mills NL, Atuhaire C, Spoor C, Pemunta NV, Priebe G, Cumber SN. The role of  
631 faith leaders in influencing health behaviour: a qualitative exploration on the views of Black  
632 African Christians in Leeds, United Kingdom. *Pan Afr Med J*. 2018;30:199.
- 633 49. Padela AI, Malik S, Vu M, Quinn M, Peek M. Developing religiously-tailored health  
634 messages for behavioral change: Introducing the reframe, reprioritize, and reform (“3R”) model.  
635 *Social Science & Medicine*. 2018;204:92-9.
- 636 50. Malterud K, Siersma VD, Guassora AD. Sample Size in Qualitative Interview Studies:  
637 Guided by Information Power. *Qual Health Res*. 2016;26(13):1753-60.
- 638 51. Harvey WS. Strategies for conducting elite interviews. *Qualitative Research*.  
639 2011;11(4):431-41.
- 640
- 641
- 642
